# Supplementary material
Source: PubMed Central journal article supplement (PMC1489541)
Supplement: mmbr_70_2_472__1.pdf [file mmbr_70_2_472__1.pdf]

**Table 1s.** Strain descriptions. Abbreviations are as follows: PUB, phycourobilin chromophore; *gvp*, genes for gas vesicle formation; *nif*, genes for nitrogen fixation.

| Organisms      |             | Complete annotation July 2005                                                                       | Genome size (Mb) | Estimated gene number | Strain properties |                                                                                                                                                                                                                                                                                              |
|----------------|-------------|-----------------------------------------------------------------------------------------------------|------------------|-----------------------|-------------------|----------------------------------------------------------------------------------------------------------------------------------------------------------------------------------------------------------------------------------------------------------------------------------------------|
| Marine strains | Unicellular | <i>Crocospaera watsonii</i> WH 8501 ( <i>Cyanothece. Synechococcus</i> )                            | No               | 6.29                  | 6011              | Nitrogen fixer<br>Phycocyanin with PUB                                                                                                                                                                                                                                                       |
|                |             | <i>Prochlorococcus marinus</i> MIT9313                                                              | Yes              | 2.41                  | 2326              | Isolated from Gulf Stream deep ocean water. Low-light adapted strain. High divinyl-Chlb/a <i>Prochlorococcus</i> clade IV. No phycobilisome. Atypic phycoerythrin                                                                                                                            |
|                |             | <i>Prochlorococcus marinus</i> MIT9312                                                              | No               | 1.71                  | 1811              | High-light adapted strain from Gulf Stream. Low divinyl-Chlb/a <i>Prochlorococcus</i> clade II. No phycobilisome.                                                                                                                                                                            |
|                |             | <i>Prochlorococcus marinus</i> SS120 (CCMP1375)                                                     | Yes              | 1.75                  | 1926              | Low-light adapted strain from Sargasso Sea. High divinyl-Chlb/a <i>Prochlorococcus</i> clade II. No phycobilisome. Atypic phycoerythrin                                                                                                                                                      |
|                |             | <i>Prochlorococcus marinus</i> MED4                                                                 | Yes              | 1.66                  | 1757              | Isolated from surface water of an oligotrophic mediterranean area, High-light adapted strain. Low-divinyl-Chlb/a <i>Prochlorococcus</i> clade I. No phycobilisome.                                                                                                                           |
|                |             | <i>Synechococcus</i> sp. CC9902                                                                     | No               | 2.23                  | 2373              | Coastal (California current)                                                                                                                                                                                                                                                                 |
|                |             | <i>Synechococcus</i> sp. CC9605                                                                     | No               | 2.51                  | 2747              | Isolated from an oligotrophic area (California current)                                                                                                                                                                                                                                      |
|                |             | <i>Synechococcus</i> sp. WH8102                                                                     | Yes              | 2.43                  | 2578              | Obligate marine. Marine A <i>Synechococcus</i> clade III from Western Caribbean. Phycoerythrin with PUB, chromophorylated linker polypeptides. Elevated growth requirements for Na <sup>+</sup> , but also for Cl <sup>-</sup> , Mg <sup>2+</sup> , and Ca <sup>2+</sup> . Swimming motility |
|                | Filamentous | <i>Trichodesmium erythraeum</i> IMS101                                                              | No               | 8.19                  | 4801              | Nitrogen fixer. Upper levels of tropical oceans. Synchronous cell divisions within a trichome. Phycoerythrin with PUB. Gas vesicle ( <i>gvp</i> ) genes. Gliding motility                                                                                                                    |
| Others         | Unicellular | <i>Gloeobacter violaceus</i> PCC 7421                                                               | Yes              | 4.66                  | 4478              | No thylakoid membrane. Rod-shaped phycobilisomes directly attached to the cytoplasmic membrane. Phycoerythrin with PUB. Isolated from calcareous rock                                                                                                                                        |
|                |             | <i>Synechocystis</i> sp. PCC 6803                                                                   | Yes              | 3.95                  | 3614              | Euryhaline. Facultative heterotroph. Twitching (gliding) motility                                                                                                                                                                                                                            |
|                |             | <i>Thermosynechococcus elongatus</i> BP-1                                                           | Yes              | 2.59                  | 2521              | Thermophile                                                                                                                                                                                                                                                                                  |
|                |             | <i>Synechococcus elongatus</i> PCC 7942                                                             | No               | 2.69                  | 2663              | Strict photoautotroph. Phycobilisome core with only two cylinders of allophycocyanin                                                                                                                                                                                                         |
|                | Filamentous | <i>Anabaena</i> sp. PCC 7120                                                                        | Yes              | 7.21                  | 6217              | Heterocyst differentiation (hormogonium?). Nitrogen fixer. Phycoerythrocyanin. Gas vesicle ( <i>gvp</i> ) genes                                                                                                                                                                              |
|                |             | <i>Anabaena variabilis</i> ATCC 29413 (PCC7937, <i>Anabaena flos-aquae</i> CCAP 1403/13A. UTEX1444) | No               | 7.11                  | 5809              | Heterocyst, hormogonium and akinete differentiation. Nitrogen fixer (3 <i>nif</i> gene sets). Facultative heterotroph. Phycoerythrocyanin. Photosynthetic H <sub>2</sub> production. gas vesicle ( <i>gvp</i> ) genes                                                                        |
|                |             | <i>Nostoc punctiforme</i> PCC 73102 (ATCC 29133)                                                    | Yes              | 9.06                  | 7465              | Heterocyst, hormogonium and akinete differentiation. Nitrogen fixer. Endosymbiont. Gas vesicle ( <i>gvp</i> ) genes. Facultative photo- and chemoheterotroph. Phycoerythrin. Complementary Chromatic Adaptation type II                                                                      |

Table 2s. Structural domains that may be found in two component regulatory systems cyanobacterial proteins.

| <b>Domain acronym</b> | <b>IterProScan identifier</b> | <b>Known properties and/or function</b>                                                                                                                                                                                                                                                                                                                                           |
|-----------------------|-------------------------------|-----------------------------------------------------------------------------------------------------------------------------------------------------------------------------------------------------------------------------------------------------------------------------------------------------------------------------------------------------------------------------------|
| AraC                  | IPR000005                     | Related to the arabinose operon regulatory protein AraC, usually positive transcriptional factors, spans roughly 100 residues and comprises two HTH subdomains                                                                                                                                                                                                                    |
| Cache                 | IPR004010                     | Signaling domain found in a certain class of prokaryotic chemotaxis receptors                                                                                                                                                                                                                                                                                                     |
| CBS                   | IPR000644                     | CBS (cystathionine-beta-synthase) are small intracellular modules, mostly found in two or four copies which can act as binding domains for adenosine derivatives and sensors of cellular energy status, may function to form pores in membranes                                                                                                                                   |
| CHASE                 | IPR006189                     | Extracellular domain of 200-230 amino acids found in transmembrane receptors, named from its presence in diverse receptor-like proteins with histidine kinase and nucleotide cyclase domains (Cyclases/Histidine kinases Associated Sensory Extracellular), always N-terminally in extracellular or periplasmic locations, predicted to bind diverse low molecular weight ligands |
| CHASE2                | IPR007890                     | CHASE2 domains are specifically found in histidine kinases, adenylate cyclases, serine/threonine kinases and predicted diguanylate cyclases/phosphodiesterases.                                                                                                                                                                                                                   |
| CHASE3                | IPR007891                     | ibid                                                                                                                                                                                                                                                                                                                                                                              |
| CheB                  | IPR000673                     | N-terminal domain found in CheB methyl-esterase which removes a methyl group in the methyl-accepting chemotaxis proteins (MCP). CheB is regulated through phosphorylation by CheA.                                                                                                                                                                                                |
| CheR                  | IPR000780                     | CheR are methylating enzymes (MCP methyltransferase)                                                                                                                                                                                                                                                                                                                              |
| CheW                  | IPR002545                     | CheW-like protein, CheW interacts with the methyl accepting chemotaxis proteins (MCPs) and relays signals to the response regulator CheY which affects flagellar rotation                                                                                                                                                                                                         |
| cNMP                  | IPR000595                     | Domain of about 120 residues shared by proteins which bind cyclic nucleotides (cAMP or cGMP)                                                                                                                                                                                                                                                                                      |
| EAL                   | IPR001633                     | Called EAL after its conserved residues, good candidate for a diguanylate phosphodiesterase function, often along with PAS. Also known as DUF2.                                                                                                                                                                                                                                   |
| FHA                   | IPR000253                     | Forkhead-associated (FHA) is a phosphopeptide recognition domain, spans approximately 80-100 amino acid residues, present in a diverse range of proteins, from kinases and phosphatases, to transcription factors and metabolic enzymes involved in many different cellular processes                                                                                             |
| GAF                   | IPR003018                     | Present in phytochromes (Phyt_2) and cGMP-specific phosphodiesterases, also found in NifA, a transcriptional activator required for activation of most <i>nif</i> operons                                                                                                                                                                                                         |

|               |           |                                                                                                                                                                                                                                                                                                                                                                                                                         |
|---------------|-----------|-------------------------------------------------------------------------------------------------------------------------------------------------------------------------------------------------------------------------------------------------------------------------------------------------------------------------------------------------------------------------------------------------------------------------|
| GGDEF         | IPR000160 | Ubiquitous in bacteria and often linked to a regulatory domain, such as a phosphorylation receiver or oxygen sensing domain, and in proteins which synthesizes cyclic di-GMP. Also known as DUF1.                                                                                                                                                                                                                       |
| GuC           | IPR001054 | Catalytic domain of class III adenylyl /guanylyl cyclase (AC/GC)                                                                                                                                                                                                                                                                                                                                                        |
| HD            | IPR008328 | Domain found in a superfamily of enzymes with a predicted or known phosphohydrolase activity (Metal-dependent phosphohydrolase), such as 3',5'-cGMP phosphodiesterase                                                                                                                                                                                                                                                   |
| HATP          | IPR003594 | HATPase_c domains are found in several ATP-binding proteins such as: histidine kinase, DNA gyrase B, topoisomerases, heat shock protein HSP90, phytochrome-like ATPases and DNA mismatch repair proteins                                                                                                                                                                                                                |
| HisKA         | IPR003661 | Histidine kinase A (phosphoacceptor) N-terminal domain is a dimerisation and phosphoacceptor domain of histidine kinases                                                                                                                                                                                                                                                                                                |
| HisKA_2 (HWE) | IPR011495 | Dimerisation and phosphoacceptor domain of a subfamily of histidine kinases                                                                                                                                                                                                                                                                                                                                             |
| HisKA_3       | IPR011712 | Dimerisation and phosphoacceptor domain of a sub-family of histidine kinases                                                                                                                                                                                                                                                                                                                                            |
| Hkd           | IPR004105 | homodimer interface of the signal transducing histidine kinase family                                                                                                                                                                                                                                                                                                                                                   |
| HMP           | IPR003660 | HAMP region found in front of the HisKA domains in proteins which are usually integral membrane proteins                                                                                                                                                                                                                                                                                                                |
| Hpt           | IPR008207 | Present, usually at the N terminus, in proteins which undergo autophosphorylation, can mediate phosphotransfer reactions in multistep phosphorelay two-component systems                                                                                                                                                                                                                                                |
| HTH           | IPR010985 | DNA-binding domains found in several bacterial repressors which are usually obligate dimers by interactions of their N-Terminal domains                                                                                                                                                                                                                                                                                 |
| HNOBA         | IPR011645 | The HNOBA (HNOBAssociated) domain is found associated with the HNOB ( <u>H</u> eme- <u>N</u> itric <u>O</u> xide <u>B</u> inding) domain and <a href="#">IPR001054</a> in soluble cyclases and signalling proteins. The HNOB domain is predicted to function as a heme-dependent sensor for gaseous ligands, and transduce diverse downstream signals in both bacteria and animals. Function guanylate cyclase activity |
| KaiB          | IPR011649 | The cyanobacterial clock proteins KaiA and KaiB are proposed as regulators of the circadian rhythm in cyanobacteria. Mutations in both proteins have been reported to alter or abolish circadian rhythmicity. KaiB adopts an alpha-beta meander motif and is found to be a dimer                                                                                                                                        |
| LuxR          | IPR000792 | DNA-binding HTH domain of about 65 amino acids, present in transcription regulators of the LuxR/FixJ/NarL family of response regulators                                                                                                                                                                                                                                                                                 |
| MASE1         | IPR007895 | Domain of unknown function found in proteins of unknown function                                                                                                                                                                                                                                                                                                                                                        |
| MHYT          | IPR005330 | Named after its conserved amino acid motif, methionine, histidine, and tyrosine (~190-residue), consists of six predicted transmembrane (TM) segments, connected by short arginine-rich                                                                                                                                                                                                                                 |

|          |           |                                                                                                                                                                                                          |
|----------|-----------|----------------------------------------------------------------------------------------------------------------------------------------------------------------------------------------------------------|
|          |           | cytoplasmic and periplasmic loops rich in charged residues                                                                                                                                               |
| PAC      | IPR000700 | 40-45 amino acids usually situated C-terminal to PAS (PAC = PAS-associated, C-terminal), contributes to PAS domain fold                                                                                  |
| PAS      | IPR000014 | Sensor domain (~60 aa-long) of many signalling proteins, several detect their signal by way of an associated cofactor, such as heme or flavin, often associated with PAC domains                         |
| PHYT     | IPR001294 | Found in plant phytochromes, senses the red and far-red light conditions through a covalently bound linear tetrapyrrole which is responsible for the reversible photochemical conversion                 |
| Pkinase  | IPR000719 | Conserved catalytic core common with both serine/threonine and tyrosine protein kinases                                                                                                                  |
| PP2C_SIG | IPR001932 | Protein phosphatase 2C-like domain found in protein phosphatase 2C, pyruvate dehydrogenase (lipoamide)-phosphatase and adenylate cyclase. (SpoIIE sometimes used as it is a Protein phosphatase 2C-like) |
| RR       | IPR001789 | CheY-, PatA-, and OmpR-like domains                                                                                                                                                                      |
| Treg     | IPR001867 | C-terminal part of transcriptional regulatory protein                                                                                                                                                    |
| Trk      | IPR006037 | TrkA-C is often found next to the TrkA-N domain, exact function of this domain is unknown, may bind an unidentified ligand                                                                               |
| UPF      | IPR005360 | Domain with a conserved GRY motif, found in a family of proteins about 80 amino acids-long of unknown function. This family appears to be related to ribbon-helix-helix DNA-binding proteins.            |

Table 3s. Two-component proteins from the 16 complete cyanobacterial genomes available as of May 205, for which no cyanobacterial orthologue could be retrieved. The *Anabaena* 7120 and *Escherichia coli* K12 sequences used in the searches to retrieve the putative proteins containing histidine kinase (HK) and response regulator (RR) domains were as follows: RR-CheY, 7120 alr0442 and *E. coli* NP\_416396.1; RR-OmpR, 7120 all3822 (aa 7-124) and *E. coli* NP\_417864.1 (aa 5-124); T\_reg, 7120 all3822 (aa 151-233) and *E. coli* NP\_417864.1 (aa 156-232); HisKA-HATPase, 7120 all0330 (aa 429-656) and *E. coli* NP\_417863.1 (aa 234-439); and Hpt, 7120 all1068 (aa 8-111) and *E. coli* NP\_415513.1 (aa 815-896). Analyses performed at the IMG site (Integrated Microbial Genomes, <http://img.jgi.doe.gov/cgi-bin/pub/main.cgi>), and at European Bioinformatics Institute (<http://www.ebi.ac.uk/InterProScan/>) and <http://www.cbs.dtu.dk/services/TMHMM/> for the domain structure assignments. Whenever a single gene or a member of a group has been assigned a function in the literature and/or an annotation in databases, the gene name is mentioned. (⊠) indicates proteins that do not have any bacterial orthologues.

#### A. Two component system proteins (singletons)

| Gene Name                             | Classification                 | Functional or Temporary gene name |
|---------------------------------------|--------------------------------|-----------------------------------|
| NpunNpF0536                           | HKA                            | <i>chk113</i>                     |
| NpunNpR3010                           | HKA                            | <i>chk114</i>                     |
| Cwat_400841320                        | HKA                            | <i>chk115</i>                     |
| TBP1tr2426                            | HATPase                        | <i>chk116</i>                     |
| NpunNpF3113, 100% id with NpunNpF2204 | HATPase                        | <i>chk117</i>                     |
| NpF2204, 100% id with NpunNpF3113     | HATPase                        | <i>chk118</i>                     |
| NpunNpF2205, 100% id with NpunNpF3114 | HATPase                        | <i>chk119</i>                     |
| NpunNpF3114, 100% id with NpunNpF2205 | HATPase                        | <i>chk120</i>                     |
| Cwat_400841350                        | HATPase                        | <i>chk121</i>                     |
| Cwat_400874080                        | HATPase                        | <i>chk122</i>                     |
| NpunpNPBF140                          | HKI                            | <i>chk123</i>                     |
| 7421glr3138                           | HKI                            | <i>chk124</i>                     |
| 7421gll0380                           | HKI                            | <i>chk125</i>                     |
| 6803sll0790                           | HKI                            | <i>chk31, hik31</i>               |
| 7120all7605                           | HKI                            | <i>chk126</i>                     |
| 7421glr3138                           | HKI                            | <i>chk127</i>                     |
| NpunpNPBF140                          | HKI                            | <i>chk128</i>                     |
| SS12Pro1543                           | HKI (N-ter (TM) <sub>6</sub> ) | <i>chk129</i>                     |
| Avar_400185180                        | HKI                            | <i>chk130</i>                     |
| NpunNpF1775                           | HKI (HisKA_3)                  | <i>chk131</i>                     |
| 7421gll1816                           | HKII + GAF                     | <i>chk132</i>                     |
| NpunNpR2209                           | HKII + GAF                     | <i>chk133</i>                     |
| 7421gll2627                           | HYII + GAF                     | <i>chk134</i>                     |
| Tery_403225400                        | HKII +GAF                      | <i>chk135</i>                     |
| Tery_403256460                        | HKII + GAF                     | <i>chk136</i>                     |

|                |                                    |              |
|----------------|------------------------------------|--------------|
| NpunNpR1759    | HKII + 2 GAF                       | chk137       |
| NpunNpR5313    | HKII + 2 GAF                       | chk138       |
| NpunpNPAF142   | HKII + 3 GAF                       | chk139       |
| NpunNpR5113    | HKII + 4 GAF                       | chk140       |
| Cwat_400862060 | HKII + Phytochrome                 | chk141       |
| Cwat_400870170 | HKII + PAC-GAF                     | chk142       |
| 7421glr1239    | HKII + PASPAC-GAF                  | chk143       |
| 6803sll1124    | HKII + GAF-mPASPAC                 | chk3, hik3   |
| 7120alr2123    | HKII + PASPAC                      | chk144 (α)   |
| NpunNpR3198    | HKII + PASPAC                      | chk145 (α)   |
| NpunNpF4953    | HKII + PASPAC                      | chk146       |
| NpunNpR3581    | HKII + PASPAC                      | chk147       |
| NpunpNPAR133   | HKII + PASPAC                      | chk148       |
| Avar_400177700 | HKII + (PASPAC) <sub>2</sub>       | chk149       |
| NpunNpF5383    | HKII + PASPAC                      | chk150       |
| 6803sll1003    | HKII + (PASPAC) <sub>3</sub>       | chk13, hik13 |
| NpunNpF2121    | HKII + (PASPAC) <sub>3</sub>       | chk151       |
| Tery_403260760 | HKII + PAS                         | chk153       |
| NpunNpR6525    | HKII + PAS                         | chk154       |
| Avar_400193580 | HKIII + Cache                      | chk155       |
| 7421glr3675    | HKIII + HAMP                       | chk156       |
| NpunNpR6338    | HKIII + HAMP                       | chk157       |
| NpunpNPAR140   | HKIII + HAMP                       | chk158 (α)   |
| 7421gll0814    | HKIII + HAMP-PAC                   | chk159       |
| NpunNpR0401    | HKIII + HAMP-Cache                 | chk160       |
| NpunNpF3779    | HKIII + Cache                      | chk177       |
| NpunNpF6040    | HKIII + HAMP-GAF-Cache             | chk161       |
| 7120alr0709    | HKIV                               | chk162       |
| 7120all1625    | HKIV                               | chk163       |
| 7120all2282    | HKIV                               | chk164       |
| Avar_400222710 | HKIV                               | chk165       |
| NpunNpR2272    | HKIV                               | chk166       |
| NpunNpF0342    | HKIV                               | chk167       |
| NpunNpR6545    | HKIV                               | chk168       |
| Tery_403260730 | HKV + CheW                         | chk169       |
| NpunNpR3054    | HKV + CHASE                        | chk170       |
| NpunNpF3675    | HKV + CHASE3                       | chk171       |
| NpunNpR0610    | HKV + CHASE3-(PASPAC) <sub>2</sub> | chk172       |
| 7421glr2059    | HKV + Trk                          | chk173       |
| Tery_403252270 | HKV + cNMP                         | chk175       |
| 7421gll1661    | HKV + cNMP                         | chk109       |
| Tery_403220860 | HKV + CHASE                        | chk176       |
| TBP1dl12438    | RRI CheY                           | crr103       |
| Cwat_400845910 | RRI CheY                           | crr104       |
| 7120all4927    | RRI CheY                           | crr105 (α)   |
| 7421glr1534    | RRI CheY                           | crr106       |
| 7421glr2272    | RRI CheY                           | crr107       |
| 7421glr2257    | RRI CheY                           | crr108       |
| 7421glr1532    | RRI CheY                           | crr109 (α)   |
| Tery_403244930 | RRI CheY                           | crr110 (α)   |
| Tery_403262790 | RRI CheY                           | crr111       |
| Tery_403235360 | RRI Other (>200aa-long)            | crr112       |
| Tery_403235350 | RRI CheY                           | crr113       |
| Avar_400193570 | RRI CheY                           | crr114 (α)   |
| Avar_400193560 | RRI CheY                           | crr115 (α)   |
| NpunNpR1758    | RRI CheY                           | crr116 (α)   |
| NpunNpF3566    | RRI CheY                           | crr117       |
| NpunNpF5044    | RRI CheY                           | crr118       |
| NpunNpF1085    | RRI CheY                           | crr119       |
| NpunpNPBR170   | RRI CheY                           | crr120 (α)   |
| NpunpNPBR131   | RRI CheY                           | crr121 (α)   |
| NpunNpF3676    | RRI CheY                           | crr122       |
| 7942_403102070 | RRI CheY                           | crr123       |
| Cwat_400880570 | RRI CheY                           | crr124 (α)   |

|                |                         |                                 |
|----------------|-------------------------|---------------------------------|
| Cwat_400836210 | RRI CheY                | <i>crr125</i>                   |
| NpunNpR1757    | RRI CheY                | <i>crr175</i>                   |
| 6803slr1214    | RRI PatA                | <i>crr15, rre15</i> (α)         |
| 6803slr1594    | RRI PatA                | <i>crr5, rre5</i> (α)           |
| 6803slr1693    | RRI PatA                | <i>crr24, rre24</i> (α)         |
| 7120all3348    | RRI other (>200aa-long) | <i>crr126</i>                   |
| Cwat_400874090 | RRI other (>200aa-long) | <i>crr127</i>                   |
| Cwat_400841340 | RRI other (>200aa-long) | <i>crr128</i>                   |
| 7120all2281    | RRI other (>200aa-long) | <i>crr174</i>                   |
| 6803sll0797    | RRI OmpR                | <i>crr33, rre33, nrsR, rppA</i> |
| 6803sll0789    | RRI OmpR                | <i>crr34, rre34, copR</i>       |
| 7120alr1170    | RRI OmpR                | <i>crr129</i>                   |
| 7120all7606    | RRI OmpR                | <i>crr130</i>                   |
| 7421glr0281    | RRI OmpR                | <i>crr131</i>                   |
| 7421glr3139    | RRI OmpR                | <i>crr132</i>                   |
| NpunNpR3241    | RRI OmpR                | <i>crr133</i>                   |
| NpunNpR1903    | RRI OmpR                | <i>crr134</i>                   |
| NpunNpF3064    | RRI OmpR                | <i>crr135</i>                   |
| NpunNpR6204    | RRI OmpR                | <i>crr136</i>                   |
| NpunNpF6321    | RRI OmpR                | <i>crr137</i>                   |
| NpunpNPBF139   | RRI OmpR                | <i>crr138</i>                   |
| Avar_400216090 | RRII NarL               | <i>crr139</i>                   |
| 7421gll0379    | RRII NarL               | <i>crr140</i>                   |
| NpunNpF1800    | RRII NarL               | <i>crr141</i>                   |
| NpunNpF1776    | RRII NarL               | <i>crr142</i>                   |
| 7120alr9013    | RRII NarL               | <i>crr143</i>                   |
| 7120alr8531    | RRII NarL               | <i>crr144</i>                   |
| 7421glr0273    | RRII NarL               | <i>crr145</i>                   |
| 7421glr0773    | RRII NarL               | <i>crr146</i>                   |
| 7421gll2210    | RRII NarL               | <i>crr147</i>                   |
| 7421glr0244    | RRII NarL               | <i>crr148</i>                   |
| 7421gll0062    | RRII NarL               | <i>crr149</i>                   |
| SS12Pro1542    | RRII NarL               | <i>crr150</i>                   |
| NpunNpR0956    | RRII NarL               | <i>crr151</i>                   |
| 6803slr1213    | RRII AraC               | <i>crr14, rre14</i>             |
| 7120alr0429    | RRII AraC               | <i>crr152</i>                   |
| NpunNpF1278    | RRII AraC               | <i>crr153</i>                   |
| NpunNpR3197    | RRII AraC               | <i>crr154</i>                   |
| NpunpNPAF075   | RRII AraC               | <i>crr155</i>                   |
| NpunNpR2091    | RRII AraC               | <i>crr156</i>                   |
| 6803slr0687    | RRIV + GGDEF            | <i>crr4, rre4</i>               |
| Tery_403260660 | RRIV +GGDEF             | <i>crr157</i>                   |
| 7421gll4160    | RRIV + GGDEF            | <i>crr158</i>                   |
| Cwat_400861080 | RRIV + GGDEF            | <i>crr159</i>                   |
| 7942_403103420 | RRIV + PASPAC-GGDEF     | <i>crr160</i>                   |
| 6803slr1305    | RRIV + PASPAC-EAL-GGDEF | <i>crr41, rre41</i>             |
| NpunNpR3564    | RRIV + PAC-EAL-GGDEF    | <i>crr161</i>                   |
| NpunNpF3678    | RRIV + PASPAC-EAL-GGDEF | <i>crr162</i>                   |
| 6803slr2100    | RRIV + HD               | <i>crr20, rre20</i>             |
| Cwat_400840880 | RRIV + PACPAS           | <i>crr163</i>                   |
| Tery_403262700 | RRIV + GuC              | <i>crr164</i>                   |
| 7120alr2280    | RRIV + PP2C_SIG         | <i>crr165</i>                   |
| NpunNpR0244    | RRIV + CheB             | <i>crr166</i>                   |
| Tery_403260700 | RRIV + CheB             | <i>crr167</i>                   |
| Tery_403260740 | RRIV + CheC             | <i>crr168</i>                   |
| NpunNpF5527    | RRIV + IF2              | <i>crr169</i>                   |
| Cwat_400887000 | RRIV + CheW             | <i>crr170</i>                   |
| 7421glr1768    | RRIV + cNMP             | <i>crr171</i>                   |
| 6803slr2099    | HYI                     | <i>chy40, hik40</i>             |
| 7120all0637    | HYI                     | <i>chy95</i>                    |
| NpunNpF5480    | HYI                     | <i>chy96</i>                    |
| 7942_403108060 | HYI                     | <i>chy97</i>                    |
| Tery_403232010 | HYI                     | <i>chy98</i>                    |
| NpunNpF0957    | HYI                     | <i>chy99</i>                    |

|                |                                                                               |                            |
|----------------|-------------------------------------------------------------------------------|----------------------------|
| Tery_403234400 | HYI                                                                           | <i>chy100</i>              |
| NpunpNPAR130   | HYI                                                                           | <i>chy101</i>              |
| NpunNpF1601    | HYI                                                                           | <i>chy102</i>              |
| NpunNpR2271    | HYI                                                                           | <i>chy103</i>              |
| NpunNpF5043    | HYI + PAS                                                                     | <i>chy104</i>              |
| 7421gll1533    | HYI + PASPAC                                                                  | <i>chy105</i>              |
| 6803slr0222    | HYI + (PAS) <sub>6</sub> (PAC) <sub>5</sub>                                   | <i>chy25, hik25</i>        |
| NpunNpF1185    | HYI + GAF                                                                     | <i>chy106</i>              |
| NpunNpR2903    | HYI + GAF-PASPAC                                                              | <i>chy107</i>              |
| NpunNpF3677    | HYI (HKA_2)                                                                   | <i>chy108</i>              |
| NpunNpF1799    | HYI (HKA_3)                                                                   | <i>chy109</i>              |
| NpunNpF5092    | HYII (PASPAC) <sub>3</sub> -GAF                                               | <i>chy110</i>              |
| NpunNpR1760    | HYII + GAF                                                                    | <i>chy111</i>              |
| NpunNpR2268    | HYII + (PASPAC) <sub>2</sub>                                                  | <i>chy112</i>              |
| Avar_400190700 | HYII + PASPAC                                                                 | <i>chy113</i>              |
| 7421gll4411    | HYII + (PASPAC) <sub>2</sub>                                                  | <i>chy114</i>              |
| NpunpNPAR131   | HYII + PASPAC                                                                 | <i>chy115</i>              |
| 7120all4097    | HYII + (PASPAC) <sub>3</sub>                                                  | <i>chy116</i>              |
| NpunNpF1600    | HYII                                                                          | <i>chy117</i>              |
| NpunNpR2035    | HYII + PAS-(PASPAC) <sub>3</sub>                                              | <i>chy118</i>              |
| NpunNpR3591    | HYII + PAS-PAC-(PASPAC) <sub>2</sub>                                          | <i>chy119</i>              |
| NpunNpR4211    | HYII + PAS-(PASPAC) <sub>4</sub>                                              | <i>chy120</i>              |
| NpunNpF4131    | HYII + GAF                                                                    | <i>chy121</i>              |
| NpunNpR6464    | HYII + PAS-GAF                                                                | <i>chy122</i>              |
| TBP1tl11282    | HYIII + GAF-(PASPAC) <sub>2</sub> -(GAF) <sub>2</sub> -HK-(CheY) <sub>2</sub> | <i>chy123</i>              |
| Avar_400176240 | HYII + GAF-PASPAC                                                             | <i>chy124</i>              |
| 7421gll0099    | HYII + PASPAC-GAF                                                             | <i>chy125</i>              |
| NpunpNPDR038   | HYII + GAF <sub>2</sub> -(PASPAC) <sub>2</sub> -GAF-PASPAC                    | <i>chy126</i>              |
| NpunNpF5035    | HYII + PAS-PASPAC-PAS-(PASPAC) <sub>4</sub> -GAF-PASPAC-GAF                   | <i>chy127</i>              |
| NpunNpF5360    | HYII + Cache-HAMP-PAC                                                         | <i>chy128</i>              |
| Tery_403234780 | HYII + GuC-HAMP                                                               | <i>chy129</i>              |
| Tery_403234790 | HYII + GuC-HAMP                                                               | <i>chy130</i>              |
| Tery_403245090 | HYII + GuC-HAMP                                                               | <i>chy131</i>              |
| NpunNpR2263    | HYIII                                                                         | <i>chy132</i>              |
| 6803slr2098    | HYIII + Hpt-MHYT-(PASPAC) <sub>2</sub>                                        | <i>chy21, hik21</i>        |
| 7120alr2279    | HYIII + PACPAS-GAF-Hpt (N-ter HNOBA)                                          | <i>chy133</i>              |
| 6803slr1759    | HYIII + PACPAS-GAF-Hpt                                                        | <i>chy14, hik14</i>        |
| 7421glr1016    | HYIII + HAMP-GAF-CHASE3-PACPAS-2RR                                            | <i>chy134</i>              |
| Avar_400173090 | HYIV                                                                          | <i>chy135</i>              |
| NpunNpR2262    | HYIV PASPAC                                                                   | <i>chy136</i>              |
| NpunNpR5611    | HYIV PASPAC                                                                   | <i>chy137</i>              |
| NpunNpR3572    | HYIV + GAF-(PAS) <sub>6</sub> (PAC) <sub>5</sub>                              | <i>chy138</i>              |
| 6803sll1905    | HYIV + PAS-Hpt                                                                | <i>chy19, hik19</i>        |
| NpunNpF2346    | HYV + RHH_2                                                                   | <i>chy139</i>              |
| 6803slr1983    | HYVII (HisKA) + PP2C_SIG                                                      | <i>chy180, rre22, ppcE</i> |
| Cwat_400862070 | HYVII (HATPase C)                                                             | <i>chy140</i>              |
| Cwat_400866330 | HYVI + CheW (no Hkd)                                                          | <i>chy141 (α)</i>          |
| NpunNpR0245    | HYVI + CheW-Hpt                                                               | <i>chy142</i>              |
| Cwat_400841330 | HYVII (HATPase C)                                                             | <i>chy143</i>              |



Table 4s. Closely linked two-component genes and probable operons that contain two or more two-component genes in the nine complete annotated genomes. This was constructed from the Chromosome map images at Cyanobase (<http://www.kazusa.or.jp/cyano/>) and IMG (<http://img.jgi.doe.gov/cgi-bin/pub/main.cgi>) sites. Genes are identified by their locus tags.

*Synechocystis* 6803

| Assigned gene number                                                                         | Classification                                       | Functional name                        | Orthologue number                                            | Additional information  |
|----------------------------------------------------------------------------------------------|------------------------------------------------------|----------------------------------------|--------------------------------------------------------------|-------------------------|
| sll0038 <i>rre36</i><br>sll0039 <i>rre35</i><br>sll0043 <i>hik18</i>                         | RRI PatA<br>RRI CheY<br>HYVI+CheW                    | <i>pixL, taxAY1</i>                    | <i>crr36</i><br><i>crr35</i><br><i>chy18</i>                 |                         |
| sll0789 <i>rre34</i><br>sll0790 <i>hik31</i>                                                 | RRII OmpR<br>HKI                                     | <i>copR</i>                            | <i>crr34</i><br><i>chk31</i>                                 |                         |
| sll0797 <i>rre33</i><br>sll0798 <i>hik30</i>                                                 | RRII OmpR<br>HKI                                     | <i>rppA, nrsR</i><br><i>rppB, nrsS</i> | <i>crr33</i><br><i>chk30</i>                                 |                         |
| sll1228 <i>hik4</i><br>sll1229 <i>hik41</i>                                                  | HYII+GAF<br>HYI                                      |                                        | <i>chy4</i><br><i>chy41</i>                                  |                         |
| sll1291 <i>rre12</i><br>sll1292 <i>rre11</i><br>sll1296 <i>hik39</i>                         | RRI PatA<br>RRI CheY<br>HYVI+CheW                    |                                        | <i>crr12</i><br><i>crr11</i><br><i>chy39</i>                 | sll1294 MCP             |
| sll1590 <i>hik20</i><br>sll1592 <i>rre19</i>                                                 | HKI<br>RRII NarL                                     |                                        | <i>chk2</i><br><i>crr23</i>                                  |                         |
| sll1672 <i>hik12</i><br>sll1673 <i>rre2</i>                                                  | HYII+PAS-MASE1<br>RRIV+GGDEF                         |                                        | <i>chy12</i><br><i>crr2</i>                                  |                         |
| sll5059<br>sll5060                                                                           | RRIOther (>200aa)<br>HYIII+PACPAS-GAF-Hpt            |                                        | <i>crr43</i><br><i>chy44</i>                                 | Plasmid encoded (pSYSM) |
| slr0311 <i>hik29</i><br>slr0312 <i>rre32</i>                                                 | HKIII<br>RRII NarL                                   |                                        | <i>chk29</i><br><i>crr32</i>                                 |                         |
| slr0473 <i>hik35</i><br>slr0474 <i>rre27</i>                                                 | HKII+Phytochrome<br>RRI CheY                         | <i>cph1, aphA</i><br><i>rcp1</i>       | <i>chk35</i><br><i>crr27</i>                                 |                         |
| slr1041 <i>rre6</i><br>slr1042 <i>rre7</i>                                                   | RRI PatA<br>RRI CheY                                 | <i>pilH</i>                            | <i>rre6</i><br><i>crr7</i>                                   |                         |
| slr1213 <i>rre14</i><br>slr1214 <i>rre15</i>                                                 | RRII AraC<br>RRI PatA                                |                                        | <i>rre14</i><br><i>rre15</i>                                 |                         |
| slr1759 <i>hik14</i><br>slr1760 <i>rre8</i>                                                  | HYIII+PACPAS-GAF-Hpt<br>RRIV+GGDEF                   |                                        | <i>chy14</i><br><i>crr8</i>                                  |                         |
| slr1982 <i>rre21</i><br>slr1983 <i>rre22</i>                                                 | RRI CheY<br>HYVI-HisKA C                             |                                        | <i>crr21</i><br><i>chy180</i>                                |                         |
| slr2098 <i>hik21</i><br>slr2099 <i>hik40</i><br>slr2100 <i>rre20</i><br>slr2104 <i>hik22</i> | HYIII+Hpt-MHYT<br>HYI<br>RRIV+HD<br>HYII+GAF-PAC-Hpt |                                        | <i>chy21</i><br><i>chy40</i><br><i>crr20</i><br><i>chy22</i> |                         |
| slr6040<br>slr6041                                                                           | RRII OmpR<br>HKI                                     |                                        | <i>crr44</i><br><i>chk70</i>                                 | Plasmid encoded (pSYSX) |

*Anabaena* 7120

| Assigned gene number | Classification | Functional name | Orthologue number | Additional information |
|----------------------|----------------|-----------------|-------------------|------------------------|
|----------------------|----------------|-----------------|-------------------|------------------------|

|                                          |                                                           |                                  |                                                              |                                                        |
|------------------------------------------|-----------------------------------------------------------|----------------------------------|--------------------------------------------------------------|--------------------------------------------------------|
| all0637<br>all0638                       | HYI<br>HYII                                               |                                  | <i>chy95</i><br><i>chy71</i>                                 |                                                        |
| all0825<br>all0824<br>all0823            | HKII+GAF<br>HYII+PAS(PAC) <sub>3</sub><br>RRI CheY        |                                  | <i>chk61</i><br><i>chy66</i><br><i>crr10</i>                 |                                                        |
| all0930<br>all0929<br>all0926            | RRI PatA<br>RRI CheY<br>HYVI+CheW                         | <i>piH</i><br><i>cheA</i>        | <i>crr6</i><br><i>crr7</i><br><i>chy43</i>                   | (all928 CheW,<br>all927 – methyl<br>accepting protein) |
| all1072<br>all1071<br>all1068            | RRI PatA<br>RRI CheY<br>HYVI+CheW                         | <i>pixH, pisH</i><br><i>cheA</i> | <i>crr36</i><br><i>crr35</i><br><i>chy92</i>                 |                                                        |
| all1178<br>all1177                       | HYII+CHASE2<br>HYI                                        |                                  | <i>chy77</i><br><i>chy52</i>                                 |                                                        |
| all1281<br>all1280<br>all1279            | RRI Other (>200aa)<br>HKII+GAF-PAS-HWE<br>HYI+PAS         |                                  | <i>crr13</i><br><i>chk45</i><br><i>chy55</i>                 |                                                        |
| all1389<br>all1388                       | HYII+Cache<br>HYI                                         |                                  | <i>chy69</i><br><i>chy45</i>                                 |                                                        |
| all1704<br>all1703                       | RRII NarL<br>RRIV+GAF                                     |                                  | <i>crr25</i><br><i>crr100</i>                                |                                                        |
| all2095<br>all2094                       | HKVI+CBS-HWE-mPASPAC<br>HYI+PASPAC                        |                                  | <i>chk108</i><br><i>chy57</i>                                |                                                        |
| all2165<br>all2164<br>all2161            | RRI PatA<br>RRI CheY<br>HYVI+CheW                         | <i>cheA</i>                      | <i>crr64</i><br><i>crr51</i><br><i>chy94</i>                 |                                                        |
| all2282<br>all2281                       | HKV<br>RRI Other (>200aa)                                 |                                  | <i>chk164</i><br><i>crr174</i>                               |                                                        |
| all2875<br>all2874                       | HYIII+PACPAS-GAF-Hpt<br>RRIV+GGDEF                        |                                  | <i>chy44</i><br><i>crr8</i>                                  |                                                        |
| all2899<br>all2898<br>all2897            | HKII+Phytochrome<br>RRI CheY<br>HYI+PAS(PAC) <sub>2</sub> | <i>aphB</i>                      | <i>chk73</i><br><i>crr46</i><br><i>chy56</i>                 |                                                        |
| all2956<br>all2955                       | HKI<br>RRI CheY                                           |                                  | <i>chk59</i><br><i>crr79</i>                                 |                                                        |
| all3564<br>all3563                       | HKII<br>HKIII+PAC                                         |                                  | <i>chk16</i><br><i>chk74</i>                                 |                                                        |
| all3767<br>all3766<br>all3765<br>all3764 | HKII<br>RRI CheY<br>HYI<br>HYI                            |                                  | <i>chk77</i><br><i>crr54</i><br><i>chy54</i><br><i>chy51</i> |                                                        |
| all4097<br>all4096                       | HYII+(PAC) <sub>3</sub> PAS<br>HYI                        |                                  | <i>chy116</i><br><i>chy38</i>                                |                                                        |
| all4503<br>all4502                       | RRII OmpR<br>HKI                                          | <i>phoB</i><br><i>sphS, phoR</i> | <i>crr29</i><br><i>chk7</i>                                  | (all4501 <i>phoU</i> )                                 |
| all4727<br>all4726                       | RRII OmpR<br>HKIV+HAMP                                    |                                  | <i>crr3</i><br><i>chk10</i>                                  |                                                        |
| all5174<br>all5173<br>all5172            | RRIII+Hpt-GGDEF<br>HYIII+mPASPAC<br>RRI CheY              |                                  | <i>crr91</i><br><i>chy80</i><br><i>crr59</i>                 |                                                        |
| all5309<br>all5308                       | HYII+CHASE2<br>HYI                                        |                                  | <i>chy76</i><br><i>chy146</i>                                |                                                        |
| all7584<br>all7583                       | RRII OmpR<br>HKI                                          | <i>copR</i>                      | <i>crr44</i><br><i>chk70</i>                                 | Plasmid encoded<br>(Beta)                              |
| all7606<br>all7605                       | RRII OmpR<br>HKI                                          |                                  | <i>crr130</i><br><i>chk126</i>                               | Plasmid encoded<br>(Beta)                              |

|                                                     |                                                         |                                          |                                                                              |                                       |
|-----------------------------------------------------|---------------------------------------------------------|------------------------------------------|------------------------------------------------------------------------------|---------------------------------------|
| alr0354<br>alr0356                                  | HKIV S/Tkin-GAF<br>RRI Other (>200aa)                   |                                          | <i>chk97</i><br><i>crr70</i>                                                 |                                       |
| alr0428<br>alr0429                                  | HKII+(PAS) <sub>3</sub><br>RRII AraC                    |                                          | <i>chk79</i><br><i>crr152</i>                                                |                                       |
| alr0709<br>alr0710                                  | HKIV<br>HKV+ S/Tkin-GAF                                 |                                          | <i>chk162</i><br><i>chk107</i>                                               |                                       |
| alr1170<br>alr1171                                  | RRII OmpR<br>HKI                                        |                                          | <i>crr129</i><br><i>chk55</i>                                                |                                       |
| alr1229<br>alr1230<br>alr1231                       | HKII+ GAF-mPASPAC<br>RRIV+EAL<br>HYI                    |                                          | <i>chk32</i><br><i>crr39</i><br><i>chy42</i>                                 |                                       |
| alr1966<br>alr1967<br>alr1968                       | HKII+GAF-PASPAC<br>RRI CheY<br>HYIV+PACPAS              |                                          | <i>chk71</i><br><i>crr53</i><br><i>chy88</i>                                 |                                       |
| alr2137<br>alr2138                                  | HKIII+GAF-(PACPAS)-GAF<br>RRII NarL                     |                                          | <i>chk29</i><br><i>crr32</i>                                                 |                                       |
| alr2240<br>alr2241                                  | RRI CheY<br>HYI                                         |                                          | <i>crr47</i><br><i>chy48</i>                                                 |                                       |
| alr2279<br>alr2280                                  | HYIII+PACPAS-GAF-Hpt<br>RRIV+ PP2C_SIG                  |                                          | <i>chy133</i><br><i>crr165</i>                                               |                                       |
| alr2306<br>alr2307                                  | RRIV+EAL-GGDEF<br>HYI                                   |                                          | <i>crr98</i><br><i>chy81</i>                                                 |                                       |
| alr2428<br>alr2429                                  | HYIV Polydomain<br>RRI CheY                             |                                          | <i>chy90</i><br><i>crr56</i>                                                 |                                       |
| alr3120<br>alr3121                                  | HYII+CBS-GAF-PAC<br>HYI                                 |                                          | <i>chy28</i><br><i>chy49</i>                                                 | possibly a single protein (alr3120-1) |
| alr3155<br>alr3156<br>alr3157<br>alr3158<br>alr3159 | HKI<br>RRII NarL<br>HKII+Phytochrome<br>RRI CheY<br>HYI | <i>cph1</i> , <i>aphA</i><br><i>rcl1</i> | <i>chk47</i><br><i>crr19</i><br><i>chk35</i><br><i>crr27</i><br><i>chy23</i> |                                       |
| alr4878<br>alr4879<br>alr4880<br>alr4882            | HYII+HAMP-Cache<br>HYI<br>HYI<br>HKI                    |                                          | <i>chy145</i><br><i>chy47</i><br><i>chy50</i><br><i>chk51</i>                |                                       |
| alr5188<br>alr5189                                  | RRII OmpR<br>HKIII+HAMP                                 |                                          | <i>crr78</i><br><i>chk87</i>                                                 |                                       |

*N. punctiforme*

| Assigned gene number          | Classification                          | Functional name                          | Orthologue number                             | Additional information |
|-------------------------------|-----------------------------------------|------------------------------------------|-----------------------------------------------|------------------------|
| NpF0020<br>NpF0021<br>NpF0022 | HKII+Phytochrome<br>RRI CheY<br>HYI     | <i>cph1</i> , <i>aphA</i><br><i>rcl1</i> | <i>chk35</i><br><i>crr27</i><br><i>chy23</i>  |                        |
| NpF0303<br>NpF0304            | HKI<br>RRII NarL                        |                                          | <i>chk20</i><br><i>crr19</i>                  |                        |
| NpF1084<br>NpF1085            | RRI PatA<br>RRI CheY                    |                                          | <i>crr66</i><br><i>crr119</i>                 |                        |
| NpF1183<br>NpF1184<br>NpF1185 | HKII+Phytochrome<br>RRI CheY<br>HYI+GAF | <i>aphB</i>                              | <i>chk73</i><br><i>crr46</i><br><i>chy106</i> |                        |
| NpF1211<br>NpF1212            | HYIII+HAMP<br>HYI                       |                                          | <i>chy71</i><br><i>chy146</i>                 | NpF1210                |

|                                          |                                                              |                                        |                                                                  |                                                                    |
|------------------------------------------|--------------------------------------------------------------|----------------------------------------|------------------------------------------------------------------|--------------------------------------------------------------------|
| NpF1277<br>NpF1278                       | HKIII+PAS<br>RRI AraC                                        |                                        | <i>chk79</i><br><i>crr153</i>                                    | NpF1279                                                            |
| NpF1600<br>NpF1601                       | HYII<br>HYI                                                  |                                        | <i>chy117</i><br><i>chy102</i>                                   |                                                                    |
| NpF1775<br>NpF1776                       | HKI-HKA3<br>RRII NarL                                        |                                        | <i>chk131</i><br><i>crr142</i>                                   |                                                                    |
| NpF1799<br>NpF1800                       | HYI+HKA3<br>RRII+NarL                                        |                                        | <i>chy109</i><br><i>crr141</i>                                   |                                                                    |
| NpF2161<br>NpF2162<br>NpF2165<br>NpF2168 | RRI >200<br>RRI CheY<br>HYVI + Hpt-CheW<br>HATPase+CheW      |                                        | <i>crr67</i><br><i>crr103</i><br><i>chy93</i>                    | NpF2163 CheW<br>NpF2164 MCP-GAF<br>NpF2166 CheW<br>NpF2167 MCP-GAF |
| NpF2204<br>NpF2205                       | HisKA<br>HATPase                                             |                                        | <i>chk118</i><br><i>chk119</i>                                   | 10bp apart, possible<br>frameshift                                 |
| NpF2363<br>NpF2364                       | HYIII+PACPAS-GAF-Hpt<br>RRIV+GGDEF                           |                                        | <i>chy44</i><br><i>crr8</i>                                      |                                                                    |
| NpF3113<br>NpF3114                       | HisKA<br>HATPase                                             |                                        | <i>chk118</i><br><i>chk119</i>                                   | 10bp apart, possible<br>frameshift                                 |
| NpF3565<br>NpF3566                       | HKV+GAF<br>RRI CheY                                          |                                        | <i>chk105</i><br><i>crr117</i>                                   |                                                                    |
| NpF3675<br>NpF3676<br>NpF3677<br>NpF3678 | HKV+CHASE3<br>RRI CheY<br>HYI HKA_2<br>RRIV+PACPAS-EAL-GGDEF |                                        | <i>chk171</i><br><i>crr122</i><br><i>chy108</i><br><i>crr162</i> |                                                                    |
| NpF3778<br>NpF3779                       | HKIV S/Tkin-GAF-PASPAC<br>HKIII+Cache                        |                                        | <i>chk103</i><br><i>chk177</i>                                   |                                                                    |
| NpF3833<br>NpF3835<br>NpF3837            | HYI<br>HKI<br>HKII                                           |                                        | <i>chy50</i><br><i>chk51</i><br><i>chk78</i>                     |                                                                    |
| NpF4214<br>NpF4215                       | RRII OmpR<br>HKIII+PAS                                       | <i>phoB, sphR</i><br><i>sphS, phoR</i> | <i>crr29</i><br><i>chk7</i>                                      | NpF4216 PhoU                                                       |
| NpF5034<br>NpF5035                       | RRIV+Hpt-GGDEF<br>HYII+GAF-PASPAC                            |                                        | <i>crr93</i><br><i>chy127</i>                                    |                                                                    |
| NpF5043<br>NpF5044                       | HYI+PASPAC<br>RRI CheY                                       |                                        | <i>chy104</i><br><i>crr118</i>                                   |                                                                    |
| NpF5360<br>NpF5361<br>NpF5362            | HYII+HAMP-Cache<br>RRIV+EAL-GGDEF<br>HYI                     |                                        | <i>chy128</i><br><i>crr98</i><br><i>chy81</i>                    |                                                                    |
| NpF5479<br>NpF5480                       | HYII+HAMP-Cache<br>HYI                                       |                                        | <i>chy145</i><br><i>chy96</i>                                    |                                                                    |
| NpF5636<br>NpF5637<br>NpF5640            | RRI PatA<br>RRI CheY<br>HYVI+CheW                            |                                        | <i>crr64</i><br><i>crr51</i><br><i>chy94</i>                     | NpF5638 CheW<br>NpF5639 MCP-GAF                                    |
| NpF5960<br>NpF5961<br>NpF5964            | RRI PatA<br>RRI CheY<br>HYVI+CheW                            | <i>pilH</i><br><i>taxAY3</i>           | <i>crr6</i><br><i>crr7</i><br><i>chy43</i>                       | NpF5962 CheW<br>NpF5963 MCP                                        |
| NpF6001<br>NpF6002                       | HKII+GAF-PASPAC<br>HYI+PASPAC                                |                                        | <i>chk45</i><br><i>chy55</i>                                     |                                                                    |
| NpF6362<br>NpF6363<br>NpF6364            | HKII+GAF-PASPAC<br>RRI CheY<br>HYIV+PASPAC                   | NtrY                                   | <i>chk71</i><br><i>crr53</i><br><i>chy88</i>                     |                                                                    |
| NpR0244<br>NpR0245                       | RRIV+CheB<br>HYVI+CheW                                       |                                        | <i>crr166</i><br><i>chy143</i>                                   | NpR0246 CheW<br>NpR0247 MCP<br>NpR0248 CheR<br>NpR0249 MCP         |

|                                          |                                                                           |                                        |                                                                  |                                                  |
|------------------------------------------|---------------------------------------------------------------------------|----------------------------------------|------------------------------------------------------------------|--------------------------------------------------|
|                                          |                                                                           |                                        |                                                                  | NpR0250 CheW                                     |
| NpR0564<br>NpR0565                       | HisKA<br>HKIII+HAMP                                                       |                                        | <i>chk34</i><br><i>chk85</i>                                     |                                                  |
| NpR1109<br>NpR1110                       | RRII NarL<br>HKI                                                          |                                        | <i>crr89</i><br><i>chk174</i>                                    |                                                  |
| NpR1448<br>NpR1449                       | HYI<br>HYI                                                                |                                        | <i>chy51</i><br><i>chy54</i>                                     |                                                  |
| NpR1757<br>NpR1758<br>NpR1759<br>NpR1760 | RRI CheY<br>RRI CheY<br>HKII<br>HYII+GAF                                  |                                        | <i>crr175</i><br><i>crr116</i><br><i>chk137</i><br><i>chy111</i> |                                                  |
| NpR1778<br>NpR1779                       | HKI<br>RRII OmpR                                                          |                                        | <i>chk70</i><br><i>crr44</i>                                     |                                                  |
| NpR2262<br>NpR2263<br>NpR2268            | HYIV<br>HYIII<br>HYII+PASPAC                                              |                                        | <i>chy136</i><br><i>chy132</i><br><i>chy112</i>                  | NpR2266/7 STAS<br>NpR2264-PP2C<br>NpR2265-ATPase |
| NpR2271<br>NpR2272                       | HYI<br>HKIV                                                               |                                        | <i>chy103</i><br><i>chk166</i>                                   |                                                  |
| NpR2407<br>NpR2408                       | RRII NarL<br>HKIV+HAMP-Cache-<br>(PASPAC) <sub>2</sub> HisKA3             |                                        | <i>crr32</i><br><i>chk29</i>                                     |                                                  |
| NpR2420<br>NpR2421                       | RRII NarL<br>HKI-HKA3                                                     |                                        | <i>crr84</i><br><i>chk58</i>                                     |                                                  |
| NpR2901<br>NpR2902<br>NpR2903            | HYIV+PASPAC<br>RRI CheY<br>HYI+GAF-PASPAC                                 |                                        | <i>chy87</i><br><i>crr49</i><br><i>chy107</i>                    |                                                  |
| NpR3052<br>NpR3053<br>NpR3054            | HKIII+HAMP<br>RRI CheY<br>HKV+CHASE                                       |                                        | <i>chk82</i><br><i>crr50</i><br><i>chk170</i>                    |                                                  |
| NpR3197<br>NpR3198                       | RRII AraC<br>HKIII+PASPAC                                                 |                                        | <i>crr154</i><br><i>chk145</i>                                   |                                                  |
| NpR3562<br>NpR3564                       | HYII++ (PASPAC) <sub>2</sub> -(GAF) <sub>2</sub><br>RRIV+PACPAS-EAL-GGDEF |                                        | <i>chy64</i><br><i>crr161</i>                                    | NpR3563 GAF-<br>PASPAC, overlaps<br>with NpR3562 |
| NpR4743<br>NpR4744<br>NpR4745            | RRI CheY<br>HYII+PASPAC<br>HKII+GAF                                       |                                        | <i>crr10</i><br><i>chy66</i><br><i>chk61</i>                     |                                                  |
| NpR4768<br>NpR4769                       | RRI CheY<br>HYIV Polydomain                                               |                                        | <i>crr56</i><br><i>chy90</i>                                     |                                                  |
| NpR5315<br>NpR5316                       | HKIII+HAMP<br>RRII OmpR                                                   |                                        | <i>chk92</i><br><i>crr77</i>                                     |                                                  |
| NpR5896<br>NpR5897                       | RRIV+PACPAS<br>HYII+GAF-PASPAC                                            |                                        | <i>crr68</i><br><i>chy4</i>                                      |                                                  |
| NpR6010<br>NpR6014<br>NpR6015            | HYVI+CheW<br>RRI CheY<br>RRI PatA                                         | <i>pixH, pisH</i><br><i>pixG, pisG</i> | <i>chy92</i><br><i>crr35</i><br><i>crr36</i>                     | NpR6012 MCP-GAF<br>NpR6013 CheW                  |
| NpR6148<br>NpR6149                       | HKII<br>HKII                                                              |                                        | <i>chk74</i><br><i>chk16</i>                                     |                                                  |
| NpR6203<br>NpR6204                       | HKI<br>RRII OmpR                                                          |                                        | <i>chk55</i><br><i>crr136</i>                                    |                                                  |
| NpR6227<br>NpR6228                       | HKIII+HAMP<br>RRII OmpR                                                   |                                        | <i>chk10</i><br><i>crr3</i>                                      |                                                  |
| NpR6346<br>NpR6347                       | HYI<br>HYII+Cache                                                         |                                        | <i>chy45</i><br><i>chy69</i>                                     | NpR6348 Ser/Thr<br>kinase                        |
| pNPAR130                                 | HYI                                                                       |                                        | <i>chy101</i>                                                    | Plasmid encoded                                  |

|                      |                        |  |                                |                                                      |
|----------------------|------------------------|--|--------------------------------|------------------------------------------------------|
| pNPAR131<br>pNPAR133 | HYII+PASPAC<br>HKII    |  | <i>chy115</i><br><i>chk148</i> | pNPAR132 ModA<br>molybdate binding<br>sensor protein |
| pNPBF139<br>pNPBF140 | RRI OmpR<br>HKI        |  | <i>crr138</i><br><i>chk123</i> | Plasmid encoded                                      |
| pNPBF145<br>pNPBF146 | HKI-HKA_3<br>RRII NarL |  | <i>chk57</i><br><i>crr82</i>   | Plasmid encoded                                      |

### *T. elongatus*

| Assigned gene number          | Classification                            | Functional name             | Orthologue number                             | Additional information      |
|-------------------------------|-------------------------------------------|-----------------------------|-----------------------------------------------|-----------------------------|
| tll0572<br>tll0571<br>tll0568 | RRI PatA<br>RRI CheY<br>HYVI+CheW         | <i>cheA</i>                 | <i>crr66</i><br><i>crr51</i><br><i>chy94</i>  | tll0569 GAF-MCP             |
| tll1025<br>tll1024<br>tll1021 | RRI PatA<br>RRI CheY<br>HYVI+CheW         |                             | <i>crr12</i><br><i>crr11</i><br><i>chy142</i> | tll1022 MCP                 |
| tll1049<br>tll1048            | RRIV+GGDEF-(RR) <sub>2</sub><br>RRII NarL |                             | <i>crr173</i><br><i>crr9</i>                  |                             |
| tll1910<br>tll1909            | RRII OmpR<br>HKI                          |                             | <i>crr38</i><br><i>chk55</i>                  |                             |
| tlr0345<br>tlr0346<br>tlr0349 | RRI PatA<br>RRI CheY<br>HYVI+CheW         | <i>piH</i><br><i>taxAY3</i> | <i>crr6</i><br><i>crr7</i><br><i>chy43</i>    | tlr0347 CheW<br>tlr0348 MCP |

### *G. violaceus*

| Assigned gene number          | Classification                       | Functional name | Orthologue number                             |
|-------------------------------|--------------------------------------|-----------------|-----------------------------------------------|
| gll0023<br>gll0022            | HKIII+HAMP<br>RRII OmpR              |                 | <i>chk87</i><br><i>crr78</i>                  |
| gll0572<br>gll0571<br>gll0570 | HKI<br>RRII NarL<br>KdpD             |                 | <i>chk20</i><br><i>crr19</i><br><i>ctc1</i>   |
| gll0635<br>gll0634            | HYIII+GAF-mHAMP<br>HYIV+PACPAS       |                 | <i>chy83</i><br><i>chy86</i>                  |
| gll0814<br>gll0813            | HKIII+HAMP-PAC<br>RRII NarL          |                 | <i>chk159</i><br><i>crr17</i>                 |
| gll1662<br>gll1661            | HKV (cNMP-HK)<br>HKVI (cNMP-HK)      |                 | <i>chk59</i><br><i>chk109</i>                 |
| gll4098<br>gll4097            | HKI<br>RRII NarL                     |                 | <i>chk174</i><br><i>crr89</i>                 |
| gll4162<br>gll4161<br>gll4160 | RRII OmpR<br>HKIII+PAS<br>RRIV+GGDEF | <i>rpaA</i>     | <i>crr31</i><br><i>chk84</i><br><i>crr158</i> |
| glr0281<br>glr0282            | RRII OmpR<br>HKI                     |                 | <i>crr131</i><br><i>chk55</i>                 |
| glr0347<br>glr0348            | HATPase<br>RRII NarL                 |                 | <i>chk57</i><br><i>crr82</i>                  |
| glr0860<br>glr0861            | RRII OmpR<br>HKIII+HAMP              |                 | <i>crr3</i><br><i>chk10</i>                   |

|                               |                                                         |              |                                              |
|-------------------------------|---------------------------------------------------------|--------------|----------------------------------------------|
| glr1586<br>glr1587<br>glr1588 | HisKA<br>HKI<br>RRII NarL                               | <i>ycf29</i> | <i>chk34</i><br><i>chk2</i><br><i>crr1</i>   |
| glr1767<br>glr1768            | HKV+GAF-PAS-HWE<br>RRIV+ cNMP                           |              | <i>chk108</i><br><i>crr171</i>               |
| glr2257<br>glr2258            | RRI CheY<br>HKI                                         |              | <i>crr108</i><br><i>chk48</i>                |
| glr2272<br>glr2274            | RRI CheY<br>RRII OmpR                                   |              | <i>crr107</i><br><i>crr37</i>                |
| glr3138<br>glr3139            | HKI<br>RRII OmpR                                        |              | <i>chk124</i><br><i>crr132</i>               |
| glr3432<br>glr3433<br>glr3434 | HKII+GAF-PASPAC<br>RRI CheY<br>HYIV+PACPAS              |              | <i>chk71</i><br><i>crr53</i><br><i>chy88</i> |
| glr3562<br>glr3563            | HKII<br>RRIV-EAL                                        |              | <i>chk32</i><br><i>crr39</i>                 |
| glr4211<br>glr4212<br>glr4213 | RRIII+Hptm-RR<br>HYII+(PASPAC) <sub>2</sub><br>RRI CheY |              | <i>crr93</i><br><i>chy90</i><br><i>crr56</i> |

*P. marinus* SS120

| Assigned gene number | Classification       | Functional name | Orthologue number              |
|----------------------|----------------------|-----------------|--------------------------------|
| Pro1542<br>Pro1543   | RRII NarL<br>HATPase |                 | <i>crr150</i><br><i>chk129</i> |

*P. marinus* MED4

| Assigned gene number | Classification   | Functional name                        | Orthologue number           |
|----------------------|------------------|----------------------------------------|-----------------------------|
| PMM0705<br>PMM0706   | RRII OmpR<br>HKI | <i>phoB, sphR</i><br><i>sphS, phoR</i> | <i>crr29</i><br><i>chk7</i> |

*P. marinus* MIT9313

| Assigned gene number | Classification          | Functional name | Orthologue number            |
|----------------------|-------------------------|-----------------|------------------------------|
| PMT0805<br>PMT0804   | RRII OmpR<br>HKIII+HAMP |                 | <i>crr72</i><br><i>chk91</i> |
| PMT1356<br>PMT1357   | RRI CheY<br>RRII OmpR   |                 | <i>crr48</i><br><i>crr28</i> |

*Synechococcus* WH8102

| Assigned gene number | Classification          | Functional name                        | Orthologue number            |
|----------------------|-------------------------|----------------------------------------|------------------------------|
| SYNW0808<br>SYNW0807 | RRII OmpR<br>HKIII+HAMP |                                        | <i>crr72</i><br><i>chk91</i> |
| SYNW0947<br>SYNW0948 | RRII OmpR<br>HKI        | <i>phoB, sphR</i><br><i>sphS, phoR</i> | <i>crr29</i><br><i>chk7</i>  |
